CORRECTION

# Notification of Republication: Modeling individual time courses of thrombopoiesis during multi-cyclic chemotherapy

The PLOS Computational Biology Staff

The online version was republished to correct an equation that was typeset incorrectly. The PDF version was correct and remains unchanged. The publisher apologizes for the error.

## Reference

1. Kheifetz Y, Scholz M (2019) Modeling individual time courses of thrombopoiesis during multi-cyclic chemotherapy. PLoS Comput Biol 15(3): e1006775. <https://doi.org/10.1371/journal.pcbi.1006775> PMID: 30840616

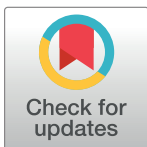

## OPEN ACCESS

**Citation:** The PLOS Computational Biology Staff (2019) Notification of Republication: Modeling individual time courses of thrombopoiesis during multi-cyclic chemotherapy. PLoS Comput Biol 15(6): e1007110. <https://doi.org/10.1371/journal.pcbi.1007110>

**Published:** June 4, 2019

**Copyright:** © 2019 The PLOS Computational Biology Staff. This is an open access article distributed under the terms of the [Creative Commons Attribution License](https://creativecommons.org/licenses/by/4.0/), which permits unrestricted use, distribution, and reproduction in any medium, provided the original author and source are credited.
